# Supplementary material
Source: publisher site journal article supplement (https://www.dovepress.com/article/557020)
Supplement: Supplementary file 1 [file 557020%20Revised%20Supplementary%20Table%201.docx]

**Supplementary table 1: Published studies utilizing The Danish Database for Hepatitis B and C (DANHEP) data or biobank samples**

| **Title** | **Authors** | **Year** | **Main findings** |
| --- | --- | --- | --- |
| **DANHEP data** |  |  |  |
| **Liver biopsy performance and histological findings among patients with chronic viral hepatitis: a Danish database study**1 | Christensen PB, Krarup HB, Møller A, et al | 2007 | Among 141 patients with hepatitis C and known duration of infection, cirrhosis had developed in 23% after 20 years of infection. |
| **Reporting chronic hepatitis B and C in Denmark**2 | Hansen N, Cowan S, Christensen PB, Weis N | 2008 | Only 50% of patients monitored at Danish hospitals with chronic hepatitis B or C were registered in the communicable diseases register. |
| **Predictors of antiviral treatment initiation in hepatitis C virus-infected patients: a Danish cohort study**3 | Hansen N, Obel N, Christensen PB, et al | 2009 | The cumulative chance of treatment initiation for chronic hepatitis C over 5 years was 33%. Predictors of treatment initiation were elevated alanine aminotransferase, genotype 2 or 3 and HIV co-infection. |
| **HBeAg and not genotypes predicts viral load in patients with hepatitis B in Denmark: a nationwide cohort study**4 | Krarup H, Andersen S, Madsen PH, et al | 2011 | In a sample of 1025 patients from DANHEP the prevalence of genotypes was: 10.5% A, 17.3% B, 20.5% C, 45.7% D, 3.2% E, 0.6% F, 1.1% G. 1% had more than one genotype. HBeAg status and not HBV genotype influenced viral load. |
| **Low liver stiffness among cirrhotic patients with hepatitis B after prolonged treatment with nucleoside analogs**5 | Andersen ES, Weiland O, Leutscher P, et al | 2011 | Prolonged treatment with nucleos(t)ide analogues in patients with chronic hepatitis B resulted in lower liver stiffness, suggesting regression of fibrosis. |
| **Lower liver stiffness in patients with sustained virological response 4 years after treatment for chronic hepatitis C**6 | Andersen ES, Moessner BK, Christensen PB, et al | 2011 | Significantly lower liver stiffness 4 years after treatment for chronic hepatitis C in patients who achieved sustained virological response compared with patients without response. |
| **Effectiveness of treatment with pegylated interferon and ribavirin in an unselected population of patients with chronic hepatitis C: a Danish nationwide cohort study**7 | Hansen N, Obel N, Christensen PB, et al | 2011 | The effectiveness of pegylated interferon and ribavirin treatment for chronic hepatitis C in a routine clinical practice is comparable to that observed in controlled clinical trials, with a higher sustained virologic response rate in genotype 2 and 3 patients compared to genotype 1 patients. |
| **Hepatitis C prevalence in Denmark -an estimate based on multiple national registers**8 | Christensen PB, Hay G, Jepsen P, et al | 2012 | The estimated prevalence of chronic hepatitis C in Denmark in 2007 was 0.38%. Less than half, were identified and among them, one in three had attended specialized care. |
| **Nationwide experience of treatment with protease inhibitors in chronic hepatitis C patients in Denmark: identification of viral resistance mutations**9 | Sølund C, Krarup H, Ramirez S, et al | 2014 | The cure rate after triple therapy in a routine clinical setting was 47%, which was substantially lower than in clinical trials. Resistance variants towards protease inhibitors were seen in 71% of patients failing therapy indicating that resistance could have an important role in treatment response. |
| **Clinical findings in a multi-ethnic adult hepatitis B virus patient population in Denmark with emphasis on genotypic characteristics**10 | Brinck-Jensen NS, Erichsen P, Tarp B, et al | 2015 | Genotype B and C were found to be associated with HBeAg positivity but not with increased liver pathology. |
| **Neutralizing antibodies in patients with chronic hepatitis C and correlation to liver cirrhosis and estimated duration of infection**11 | Pedersen J, Lundbo LF, Krarup H, Bukh J, Weis N | 2016 | Neutralizing antibody titers did not differ significantly between HCV patients with either no/mild fibrosis or cirrhosis but showed a tendency for increasing level with increased duration of infection. |
| **Sofosbuvir based treatment of chronic hepatitis C genotype 3 infections-A Scandinavian real-life study**12 | Dalgard O, Weiland O, Noraberg G, et al | 2017 | Sofosbuvir based treatment in a real-life setting could offer sustained virological response rates exceeding 90% in patients with HCV genotype 3 infection and advanced liver disease. |
| **Liver-related morbidity and mortality in patients with chronic hepatitis C and cirrhosis with and without sustained virologic response**13 | Hallager S, Ladelund S, Christensen PB | 2017 | Alcohol overuse, hepatitis C genotype 3, and diabetes were associated with liver-related morbidity in patients with CHC and cirrhosis. SVR markedly reduced liver-related morbidity and mortality. |
| **Mortality Rates in Patients with Chronic Hepatitis C and Cirrhosis Compared with the General Population: A Danish Cohort Study**14 | Hallager S, Brehm Christensen P, Ladelund S, et al | 2017 | High mortality rate among patients with chronic hepatitis C with or without cirrhosis compared with the general population. Curing hepatitis C was associated with a reduction in mortality rate among cirrhotic patients, but mortality remained higher than the general population. |
| **Vertical transmission of hepatitis B virus during pregnancy and delivery in Denmark**15 | Weis N, Cowan S, Hallager S, et al | 2017 | In an HBV low prevalence setting as Denmark, despite a national vaccination program, vertical HBV transmission occurred in 2.3% of children born to HBV-infected mothers. |
| **The Prevalence of Human Immunodeficiency Virus Coinfection Among Patients Newly Diagnosed With Chronic Hepatitis B or C in Denmark: A Nationwide Cohort Study**16 | Hallager S, Lundh A, Ladelund S, et al | 2018 | The prevalence of HIV coinfection among patients with newly diagnosed chronic viral hepatitis decreased concurrently with an increase in HIV testing prevalence. |
| **Direct acting antiviral treatment of chronic hepatitis C in Denmark: factors associated with and barriers to treatment initiation**17 | Sølund C, Hallager S, Pedersen MS, et al | 2018 | Non-adherence to medical appointments and active substance use were the major obstacles for DAA treatment initiation. |
| **The Consensus Hepatitis C Cascade of Care: Standardized Reporting to Monitor Progress Toward Elimination**18 | Safreed-Harmon K, Blach S, Aleman S, et al | 2019 | Description of a consensus HCV cascade of care for standardized reporting. |
| **Prevalence of herpes -, measles morbillivirus-, parvovirus B19 - and rubella viruses immunoglobulin G among women with chronic hepatitis B of reproductive age in Denmark: A cross-sectional study**19 | Bergløv A, Hallager S, Panum I, Weis N | 2020 | Women with chronic hepatitis B whose origin is outside Denmark were not at greater risk of acquiring herpes, morbillivirus, parvovirus B19 or rubella virus during pregnancy than their Danish counterparts. |
| **Implementation of treatment recommendations for chronic hepatitis B in patients attending specialized hospital care in Denmark - a region wide study**20 | Bollerup S, Hallager S, Baek O, et al | 2020 | Only few patients in specialized care and eligible for antiviral treatment for chronic hepatitis B remained untreated. |
| **Low incidence of HCC in chronic hepatitis C patients with pretreatment liver stiffness measurements below 17.5 kilopascal who achieve SVR following DAAs**21 | Søholm J, Hansen JF, Mössner B, et al | 2020 | Pretreatment liver stiffness predicted risk of hepatocellular carcinoma, decompensation and all-cause mortality in patients with SVR after DAA treatment. Patients with liver stiffness <17.5 kPa and no other risk factors for chronic liver disease appeared not to benefit from hepatocellular carcinoma surveillance the first 3 years after treatment. |
| **Hepatitis C prevalence in Denmark in 2016-An updated estimate using multiple national registers**22 | Nielsen S, Hansen JF, Hay G, et al | 2020 | Chronic hepatitis C prevalence in Denmark declined to 0.21% in 2016. Of them 76% were diagnosed. |
| **Ischemic Heart Disease in Chronic Hepatitis B: A Danish Nationwide Cohort Study**23 | Lau FF, Bollerup S, Engsig F, et al | 2022 | No difference between rate of ischemic heart disease in persons with chronic hepatitis B in comparison with the general population. |
| **Incidence of Hepatocellular Carcinoma and Decompensated Liver Cirrhosis and Prognostic Accuracy of the PAGE-B HCC Risk Score in a Low Endemic Hepatitis B Virus Infected Population**24 | Bollerup S, Engsig F, Hallager S, et al | 2022 | Low incidence of hepatocellular carcinoma and decompensated liver cirrhosis in persons with chronic HBV infection in Denmark. PAGE-B score showed good discrimination for five-year risk of developing hepatocellular carcinoma. |
| **Mortality and cause of death in persons with chronic hepatitis B virus infection versus healthy persons from the general population in Denmark**25 | Bollerup S, Hallager S, Engsig F, et al | 2022 | Higher mortality rate (mortality rate ratio 1.5) among persons with chronic hepatitis B compared with the general population. Excess mortality was mainly associated with liver disease, but also external factors, endocrine disease, genitourinary disease and neoplasms (excluding hepatocellular carcinoma). |
| **Increasing prevalence of chronic hepatitis B virus infection and low linkage to care in Denmark on 31 December 2016 - an update based on nationwide registers**26 | Bollerup S, Wessman M, Hansen JF, et al | 2023 | Prevalence of chronic hepatitis B in Denmark increased to 0.3% in 2016. The majority that had been diagnosed did not receive care as recommended by national guidelines and were not reported to the communicable diseases register responsible for hepatitis B virus surveillance. |
| **Cardiometabolic Comorbidities in Patients with Chronic Hepatitis B and Impact on Incidence of Liver Complications. A Danish Nationwide Cohort Study**27 | Jespersen S, Bollerup S, Madsbad S, et al | 2025 | Higher incidence rate of liver complications associated with type 2 diabetes and hypertension. Higher incidence rate of type 2 diabetes and hypertension among patients with chronic hepatitis B compared with the general population. |
| **Biobank samples** |  |  |  |
| **Molecular and epidemiological profiles of hepatitis C virus genotype 4 in Denmark**28 | Eriksen MB, Jørgensen LB, Krarup H, et al | 2010 | HCV genotype 4d prevalent among Danish intravenous drug users. |
| **Correlates of spontaneous clearance of hepatitis C virus in a Danish human immunodeﬁciency virus type 1 cohort**29 | Clausen LN, Weis N, Schønning K, et al | 2011 | The HCV clearance rate in the HIV-1 cohort was 23%. Men who have sex with men and intravenous drug users had higher clearance rates perhaps due to their repeated exposure to low-dose HCV, leading to immune memory. Data suggested interaction between HBV and HCV that inﬂuenced the outcome of acute HCV infection. |
| **IP-10 can be measured in dried plasma spots in patients with chronic hepatitis C infection**30 | Ruhwald M, Andersen ES, Christensen PB, Moessner BK | 2012 | The dried plasma spot-based method for IP-10 detection performed well in HCV-infected patients with either minimal or significant fibrosis. |
| **Neutralizing Antibodies in Patients with Chronic Hepatitis C, Genotype 1, against a Panel of Genotype 1 Culture Viruses: Lack of Correlation to Treatment Outcome**31 | Pedersen J, Jensen TB, Carlsen THR, et al | 2013 | Pre-treatment levels of neutralizing antibodies against HCV genotype 1 isolates could not predict treatment outcome in patients with chronic HCV infection. |
| **Genetic variants in the apoptosis gene BCL2L1 improve response to interferon-based treatment of hepatitis C virus genotype 3 infection**32 | Clausen LN, Weis N, Ladelund S, et al | 2015 | Anti-apoptotic single nucleotide polymorphisms in the BCL2L1 gene were predictive of sustained virological response to pegylated interferon/ribavirin treatment in HCV genotypes 1 and 3 infected individuals. |
| **Analytical performance of the Hologic Aptima HBV Quant Assay and the COBAS Ampliprep/COBAS TaqMan HBV test v2.0 for the quantification of HBV DNA in plasma samples**33 | Schønning K, Johansen K, Nielsen LG, Weis N, Westh H | 2018 | High correlation between performance of the Aptima HBV Quant Assay (Aptima) and the COBAS Ampliprep/COBAS TaqMan HBV Test v2.0 (CAPCTMv2) for the quantification of HBV DNA in plasma samples. |
| **Evolutionary Pathways to Persistence of Highly Fit and Resistant Hepatitis C Virus Protease Inhibitor Escape Variants**34 | Jensen SB, Fahnøe U, Pham LV, et al | 2019 | Comprehensive protease inhibitor resistance profiling for HCV genotypes 1-6 revealed 156-resistance associated substitutions as key determinants of high-level resistance across clinically relevant protease inhibitors. |
| **Global evolutionary analysis of chronic hepatitis C patients revealed significant effect of baseline viral resistance, including novel non-target sites, for DAA-based treatment and retreatment outcome**35 | Fahnøe U, Pedersen MS, Sølund C, et al | 2021 | Baseline resistance associated substitutions to NS5A inhibitors, but not virus population diversity, and lower viral titer decline predicted HCV treatment failure. Mutations outside of the DAA targets could be associated with DAA treatment failure. Successful DAA retreatment in patients with treatment failure was hampered by previously selected resistance associated substitutions. |
| **Inactivated genotype 1a, 2a and 3a HCV vaccine candidates induced broadly neutralising antibodies in mice**36 | Alzua GP, Pihl AF, Offersgaard A, et al | 2023 | High-yield genotype 1-3 HCV could be developed as basis for inactivated vaccine candidates inducing broadly neutralizing antibodies in mice supporting further preclinical development. |
| **Novel HCV Genotype 4d Infectious Systems and Assessment of Direct-Acting Antivirals and Antibody Neutralization**37 | Pham LV, Velázquez-Moctezuma R, Fahnøe U, et al | 2022 | Development of the first HCV genotype 4d infectious culture system enabling direct acting antiviral efficacy testing and antibody neutralization assessment. |
| **An adaptable platform for in-house hepatitis C serology**38 | Pedersen J, Moukandja IP, Ndidi S, et al | 2022 | Development, and validation of a multiepitope ELISA-based diagnostic assay against HCV. |
| **Novel hepatitis B virus reverse transcriptase mutations in patients with sustained viremia despite long-term tenofovir treatment**39 | Winckelmann A, Fahnøe U, Bajpai PS, et al | 2022 | Changes at the conserved residue 35 (H35N/Q) in the HBV reverse transcriptase may be associated with tenofovir resistance. |
| **Hepatitis C virus RNA is 5’ capped with flavin adenine dinucleotide (FAD)**40 | Sherwood AV, Rivera-Rangel LR, Ryberg LA, et al | 2023 | The study demonstrated that the cellular metabolite flavin adenine dinucleotide is used as cap on the HCV RNA. This could be used by other viruses and affect viral treatment outcomes and persistence of infection. |
| **Full-length sequence analysis of hepatitis C virus genotype 3b strains and development of an in vivo infectious 3b cDNA clone**41 | Bajpai PS, Collignon L, Sølund C, et al | 2023 | The first HCV genotype 3b full-length cDNA clone which by its infectivity and genetic stability in human-liver chimeric mice proved functionality, and potential utility in future development of infectious cell culture systems needed for this DAA treatment-resistant subtype was developed. |
| **Pre-existing, treatment-specific resistance-associated substitutions in hepatitis C virus genotype 1 and 3 and viral RNA titers during treatment with direct-acting antivirals**42 | Sølund C, Pedersen MS, Fahnøe U, et al | 2023 | For both genotypes 1- and 3-infected individuals, cirrhosis but not treatment-specific resistance associated substitutions were associated with the time of clearance of HCV RNA |
| **Effect of direct-acting antivirals on the titers of human pegivirus 1 during treatment of chronic hepatitis C patients**43 | Fahnøe U, Madsen LW, Christensen PB, et al | 2024 | Only regiments with sofosbuvir affected titers of human pegivirus 1. |
| **Higher Rates of Viral Evolution in Chronic Hepatitis B Patients Linked to Predicted T Cell Epitopes**44 | Dalegaard MI, Winckelmann A, Fahnøe U, et al | 2025 | HBV had higher rates of substitutions in patients not requiring treatment. This could be linked to host immune pressure leading to disease control. |

**References**

1. Christensen PB, Krarup HB, Møller A, et al. Liver biopsy performance and histological findings among patients with chronic viral hepatitis: a Danish database study. *Scand J Infect Dis*. 2007;39(3):245-249. doi:10.1080/00365540600978864

2. Hansen N, Cowan S, Christensen PB, Weis N, Nielsen HI, DANHEP styregruppen. Anmeldelse af kronisk hepatitis B og C i Danmark. 2008;(170):1567-1570.

3. Hansen N, Obel N, Christensen PB, et al. Predictors of antiviral treatment initiation in hepatitis C virus-infected patients: a Danish cohort study. *J Viral Hepat*. 2009;16(9):659-665. doi:10.1111/j.1365-2893.2009.01126.x 10.1111/j.1365-2893.2009.01126.x. Epub 2009 Mar 27.

4. Krarup H, Andersen S, Madsen PH, et al. HBeAg and not genotypes predicts viral load in patients with hepatitis B in Denmark: A nationwide cohort study. *Scand J Gastroenterol*. 2011;46(12):1484-1491. doi:10.3109/00365521.2011.619273

5. Andersen ES, Weiland O, Leutscher P, et al. Low liver stiffness among cirrhotic patients with hepatitis B after prolonged treatment with nucleoside analogs. *Scand J Gastroenterol*. 2011;46(6):760-766. doi:10.3109/00365521.2011.565068

6. Andersen ES, Moessner BK, Christensen PB, et al. Lower liver stiffness in patients with sustained virological response 4 years after treatment for chronic hepatitis C. *Eur J Gastroenterol Hepatol*. 2011;23(1):41-44. doi:10.1097/MEG.0b013e328341b891

7. Hansen N, Obel N, Christensen PB, et al. Effectiveness of treatment with pegylated interferon and ribavirin in an unselected population of patients with chronic hepatitis C: a Danish nationwide cohort study. *BMC Infect Dis*. 2011;11:177. doi:10.1186/1471-2334-11-177

8. Christensen PB, Hay G, Jepsen P, et al. Hepatitis C prevalence in Denmark -an estimate based on multiple national registers. *BMC Infect Dis*. 2012;12:178. doi:10.1186/1471-2334-12-178

9. Sølund C, Krarup H, Ramirez S, et al. Nationwide experience of treatment with protease inhibitors in chronic hepatitis C patients in Denmark: identification of viral resistance mutations. *PloS One*. 2014;9(12):e113034. doi:10.1371/journal.pone.0113034

10. Brinck-Jensen NS, Erichsen P, Tarp B, et al. Clinical findings in a multi-ethnic adult hepatitis B virus patient population in Denmark with emphasis on genotypic characteristics. *Scand J Gastroenterol*. 2015;50(8):1032-1038. doi:10.3109/00365521.2014.974202

11. Pedersen J, Lundbo LF, Krarup H, Bukh J, Weis N. Neutralizing antibodies in patients with chronic hepatitis C and correlation to liver cirrhosis and estimated duration of infection. *J Med Virol*. 2016;88(10):1791-1803. doi:10.1002/jmv.24537

12. Dalgard O, Weiland O, Noraberg G, et al. Sofosbuvir based treatment of chronic hepatitis C genotype 3 infections-A Scandinavian real-life study. *PloS One*. 2017;12(7):e0179764. doi:10.1371/journal.pone.0179764

13. Hallager S, Ladelund S, Christensen PB, et al. Liver-related morbidity and mortality in patients with chronic hepatitis C and cirrhosis with and without sustained virologic response. *Clin Epidemiol*. 2017;9:501-516. doi:10.2147/CLEP.S132072

14. Hallager S, Brehm Christensen P, Ladelund S, et al. Mortality Rates in Patients With Chronic Hepatitis C and Cirrhosis Compared With the General Population: A Danish Cohort Study. *J Infect Dis*. 2017;215(2):192-201. doi:10.1093/infdis/jiw527

15. Weis N, Cowan S, Hallager S, et al. Vertical transmission of hepatitis B virus during pregnancy and delivery in Denmark. *Scand J Gastroenterol*. 2017;52(2):178-184. doi:10.1080/00365521.2016.1244704

16. Hallager S, Lundh A, Ladelund S, et al. The Prevalence of Human Immunodeficiency Virus Coinfection Among Patients Newly Diagnosed With Chronic Hepatitis B or C in Denmark: A Nationwide Cohort Study. *Open Forum Infect Dis*. 2018;5(12):ofy310. doi:10.1093/ofid/ofy310

17. Sølund C, Hallager S, Pedersen MS, et al. Direct acting antiviral treatment of chronic hepatitis C in Denmark: factors associated with and barriers to treatment initiation. *Scand J Gastroenterol*. 2018;53(7):849-856. doi:10.1080/00365521.2018.1467963

18. Safreed-Harmon K, Blach S, Aleman S, et al. The Consensus Hepatitis C Cascade of Care: Standardized Reporting to Monitor Progress Toward Elimination. *Clin Infect Dis Off Publ Infect Dis Soc Am*. 2019;69(12):2218-2227. doi:10.1093/cid/ciz714

19. Bergløv A, Hallager S, Panum I, Weis N. Prevalence of herpes -, measles morbillivirus-, parvovirus B19 - and rubella viruses immunoglobulin G among women with chronic hepatitis B of reproductive age in Denmark: A cross-sectional study. *Int J Infect Dis IJID Off Publ Int Soc Infect Dis*. 2020;101:269-275. doi:10.1016/j.ijid.2020.09.1477

20. Bollerup S, Hallager S, Baek O, et al. Implementation of treatment recommendations for chronic hepatitis B in patients attending specialized hospital care in Denmark - a region wide study. *Scand J Gastroenterol*. 2020;55(7):843-847. doi:10.1080/00365521.2020.1779803

21. Søholm J, Hansen JF, Mössner B, et al. Low incidence of HCC in chronic hepatitis C patients with pretreatment liver stiffness measurements below 17.5 kilopascal who achieve SVR following DAAs. *PloS One*. 2020;15(12):e0243725. doi:10.1371/journal.pone.0243725

22. Nielsen S, Hansen JF, Hay G, et al. Hepatitis C prevalence in Denmark in 2016-An updated estimate using multiple national registers. *PloS One*. 2020;15(9):e0238203. doi:10.1371/journal.pone.0238203

23. Lau FF, Bollerup S, Engsig F, et al. Ischemic Heart Disease in Chronic Hepatitis B: A Danish Nationwide Cohort Study. *Clin Epidemiol*. 2022;14:879-888. doi:10.2147/CLEP.S361910

24. Bollerup S, Engsig F, Hallager S, et al. Incidence of Hepatocellular Carcinoma and Decompensated Liver Cirrhosis and Prognostic Accuracy of the PAGE-B HCC Risk Score in a Low Endemic Hepatitis B Virus Infected Population. *J Hepatocell Carcinoma*. 2022;9:1093-1104. doi:10.2147/JHC.S372571

25. Bollerup S, Hallager S, Engsig F, et al. Mortality and cause of death in persons with chronic hepatitis B virus infection versus healthy persons from the general population in Denmark. *J Viral Hepat*. Published online May 27, 2022. doi:10.1111/jvh.13713

26. Bollerup S, Wessman M, Hansen JF, et al. Increasing prevalence of chronic hepatitis B virus infection and low linkage to care in Denmark on 31 December 2016 - an update based on nationwide registers. *Infect Dis Lond Engl*. 2023;55(1):17-26. doi:10.1080/23744235.2022.2125065

27. Jespersen S, Bollerup S, Madsbad S, et al. Cardiometabolic Comorbidities in Patients With Chronic Hepatitis B and Impact on Incidence of Liver Complications. A Danish Nationwide Cohort Study. *Int J Gen Med*. 2025;18:1591-1604. doi:10.2147/IJGM.S471083

28. Eriksen MB, Jørgensen LB, Krarup H, et al. Molecular and epidemiological profiles of hepatitis C virus genotype 4 in Denmark. *J Med Virol*. 2010;82(11):1869-1877. doi:10.1002/jmv.21896

29. Clausen LN, Weis N, Schønning K, et al. Correlates of spontaneous clearance of hepatitis C virus in a Danish human immunodeficiency virus type 1 cohort. *Scand J Infect Dis*. 2011;43(10):798-803. doi:10.3109/00365548.2011.589077

30. Ruhwald M, Andersen ES, Christensen PB, Moessner BK, Weis N. IP-10 can be measured in dried plasma spots in patients with chronic hepatitis C infection. *PloS One*. 2012;7(9):e45181. doi:10.1371/journal.pone.0045181

31. Pedersen J, Jensen TB, Carlsen THR, et al. Neutralizing Antibodies in Patients with Chronic Hepatitis C, Genotype 1, against a Panel of Genotype 1 Culture Viruses: Lack of Correlation to Treatment Outcome. *PLoS ONE*. 2013;8(5):e62674. doi:10.1371/journal.pone.0062674

32. Clausen LN, Weis N, Ladelund S, et al. Genetic variants in the apoptosis gene BCL2L1 improve response to interferon-based treatment of hepatitis C virus genotype 3 infection. *Int J Mol Sci*. 2015;16(2):3213-3225. doi:10.3390/ijms16023213

33. Schønning K, Johansen K, Nielsen LG, Weis N, Westh H. Analytical performance of the Hologic Aptima HBV Quant Assay and the COBAS Ampliprep/COBAS TaqMan HBV test v2.0 for the quantification of HBV DNA in plasma samples. *J Clin Virol Off Publ Pan Am Soc Clin Virol*. 2018;104:83-88. doi:10.1016/j.jcv.2018.05.007

34. Jensen SB, Fahnøe U, Pham LV, et al. Evolutionary Pathways to Persistence of Highly Fit and Resistant Hepatitis C Virus Protease Inhibitor Escape Variants. *Hepatol Baltim Md*. 2019;70(3):771-787. doi:10.1002/hep.30647

35. Fahnøe U, Pedersen MS, Sølund C, et al. Global evolutionary analysis of chronic hepatitis C patients revealed significant effect of baseline viral resistance, including novel non-target sites, for DAA-based treatment and retreatment outcome. *J Viral Hepat*. 2021;28(2):302-316. doi:10.1111/jvh.13430

36. Alzua GP, Pihl AF, Offersgaard A, et al. Inactivated genotype 1a, 2a and 3a HCV vaccine candidates induced broadly neutralising antibodies in mice. *Gut*. 2023;72(3):560-572. doi:10.1136/gutjnl-2021-326323

37. Pham LV, Velázquez-Moctezuma R, Fahnøe U, et al. Novel HCV Genotype 4d Infectious Systems and Assessment of Direct-Acting Antivirals and Antibody Neutralization. *Viruses*. 2022;14(11):2527. doi:10.3390/v14112527

38. Pedersen J, Moukandja IP, Ndidi S, et al. An adaptable platform for in-house hepatitis C serology. *J Virol Methods*. 2022;308:114586. doi:10.1016/j.jviromet.2022.114586

39. Winckelmann A, Fahnøe U, Bajpai PS, et al. Novel hepatitis B virus reverse transcriptase mutations in patients with sustained viremia despite long-term tenofovir treatment. *J Clin Virol Off Publ Pan Am Soc Clin Virol*. 2022;150-151:105159. doi:10.1016/j.jcv.2022.105159

40. Sherwood AV, Rivera-Rangel LR, Ryberg LA, et al. Hepatitis C virus RNA is 5’ capped with flavin adenine dinucleotide (FAD). *Nature*. 2023;619(7971):811-818. doi:10.1038/s41586-023-06301-3

41. Bajpai PS, Collignon L, Sølund C, et al. Full-length sequence analysis of hepatitis C virus genotype 3b strains and development of an in vivo infectious 3b cDNA clone. *J Virol*. 97(12):e00925-23. doi:10.1128/jvi.00925-23

42. Sølund C, Pedersen MS, Fahnøe U, et al. Pre-existing, treatment-specific resistance-associated substitutions in hepatitis C virus genotype 1 and 3 and viral RNA titers during treatment with direct-acting antivirals. *APMIS Acta Pathol Microbiol Immunol Scand*. 2023;131(8):426-433. doi:10.1111/apm.13335

43. Fahnøe U, Madsen LW, Christensen PB, et al. Effect of direct-acting antivirals on the titers of human pegivirus 1 during treatment of chronic hepatitis C patients. *Microbiol Spectr*. 2024;12(9):e0064124. doi:10.1128/spectrum.00641-24

44. Dalegaard MI, Winckelmann A, Fahnøe U, et al. Higher Rates of Viral Evolution in Chronic Hepatitis B Patients Linked to Predicted T Cell Epitopes. *Viruses*. 2025;17(5):684. doi:10.3390/v17050684
